# Supplementary material
Source: PubMed Central journal article supplement (PMC5817610)
Supplement: jama-318-453-s001.pdf [file jama-318-453-s001.pdf]

## Supplementary Online Content

Chen LM, Epstein AM, Orav EJ, Filice CE, Samson LW, Joynt Maddox K. Association of practice-level social and medical risk with performance in the Medicare Physician Value-Based Payment Modifier Program. *JAMA*. doi:10.1001/jama.2017.9643

**eFigure 1.** Distribution of the Average Medical Risk of Patients by Practice, 2013

**eFigure 2.** Distribution of the Percentage of Dually Enrolled Patients by Practice, 2013

**eAppendix.** Additional Information About the VM Program

**eTable 1.** VM Measures and Domains

**eTable 2.** Value Modifier, 2015 Payment Year

**eTable 3.** Performance Regressions, Unadjusted

**eTable 4.** Ordinary Least Squares Payment Regressions, Unadjusted

**eTable 5.** Ordered Logistic Payment Regression, Unadjusted

**eTable 6.** Ordinary Least Squares Payment Regressions, Unadjusted, With Simulated Performance-Based Payments

**eTable 7.** Ordered Logistic Payment Regression, Unadjusted, With Simulated Performance-Based Payments

This supplementary material has been provided by the authors to give readers additional information about their work.

**eFigure 1. Distribution of the Average Medical Risk of Patients by Practice, 2013**

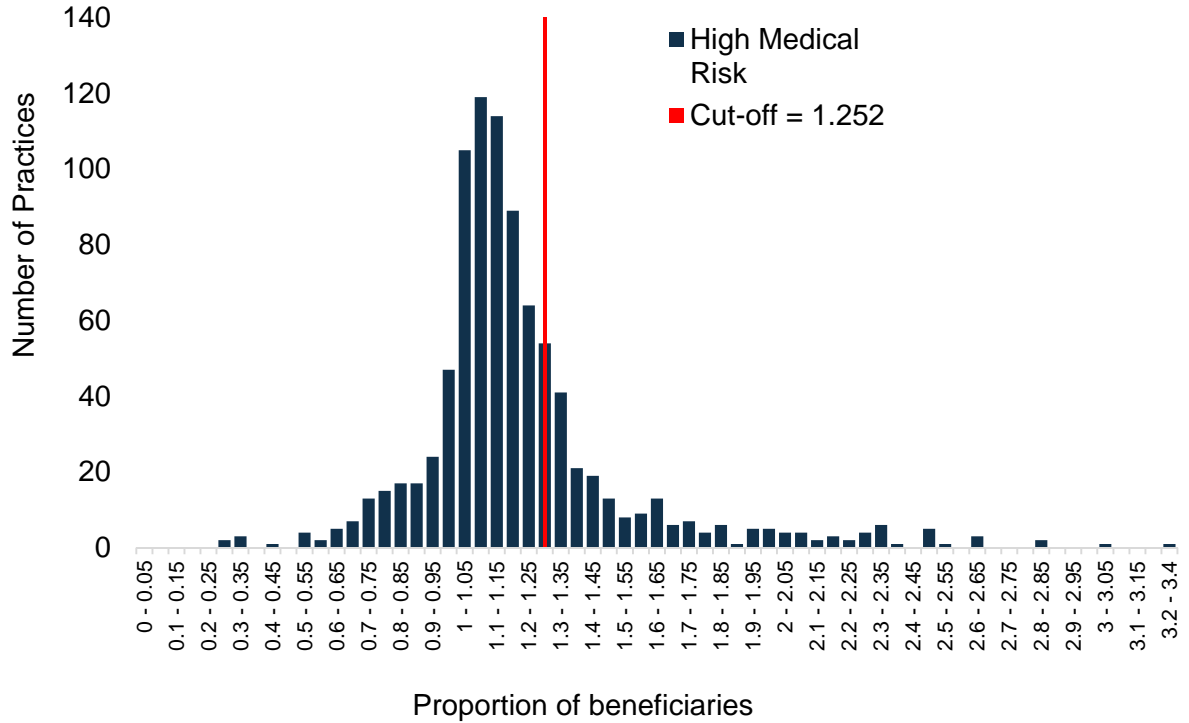

Note: Total number of practices is 899. Bin width is 0.05 (lower limit is equal to 0 and upper limit is less than 0.05, in intervals of 0.05). Practices above the cut-off point are high medical complexity practices.

**eFigure 2. Distribution of the Percentage of Dually Enrolled Patients by Practice, 2013**

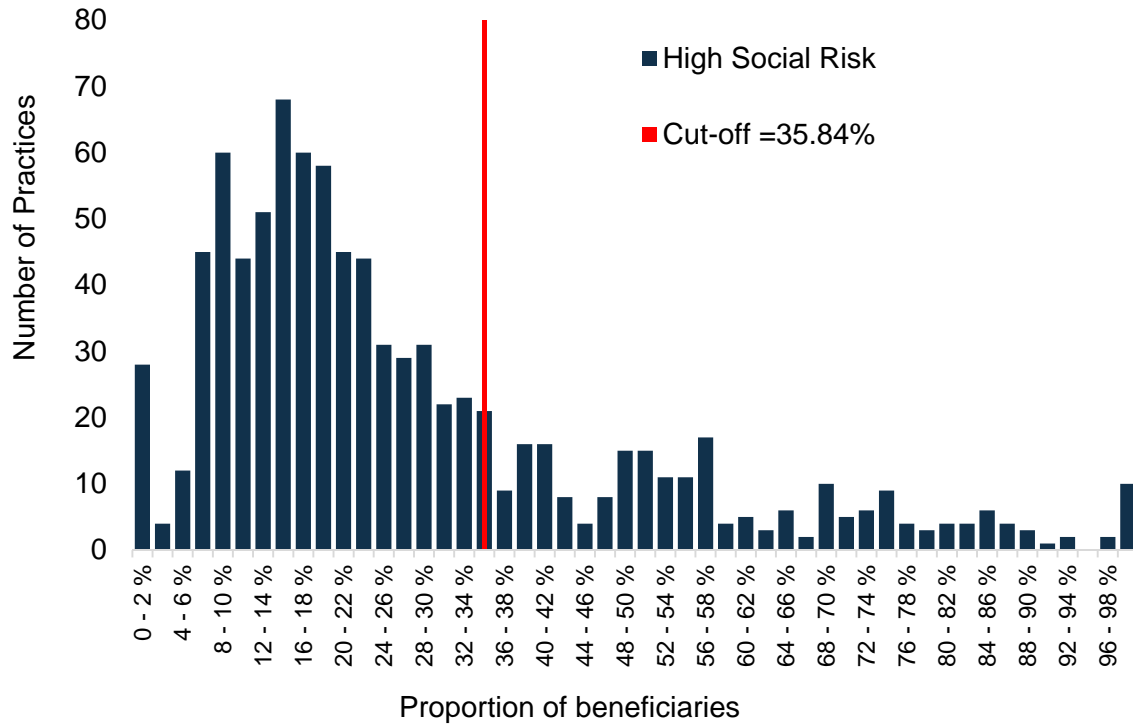

Note: Total number of practices is 899. Bin width is 2% (lower limit is equal 0% and upper limit is less than 2%, in intervals of 2%). Practices above the cut-off point are high social risk practices.

## **eAppendix. Additional Information About the VM Program**

The VM Program tied performance on quality and costs of care to bonuses and penalties for large medical practices of 100 or more eligible professionals, beginning in 2015. Eligible medical practices that did not register for the Physician Quality Reporting System (PQRS) and report at least one measure, or elect the administrative claims reporting option, received an automatic penalty of -1% applied to 2015 payments. On the other hand, medical practices that met minimum reporting requirements could elect quality tiering, which meant that payment adjustments were tied to performance via a “value modifier” that resulted in a reward, penalty or neither (i.e., a neutral adjustment). For such medical practices, there was a maximum penalty of -1% and a maximum bonus of +2%\*adjustment factor. The adjustment factor ensures that across medical practices, penalties will equal bonuses; in 2015 the adjustment factor was +4.89, so the actual maximum bonus was nearly 10%. In subsequent years of the program, smaller medical practices will become eligible for the VM Program, quality tiering will become mandatory, and penalties will increase to -4% and bonuses to +4%\*adjustment factor.

In the first year of the VM Program, practices had to report on quality using one of three mechanisms, each with its own minimum reporting requirement: 1) the Group Practice Reporting Option web interface with 24 measures, 2) a qualified registry with at least three measures chosen from the more than 200 quality metrics offered, or 3) a standard claims-based panel with 14 measures. Additionally, for all practices, there were three mandatory, claims-based quality metrics: readmissions, admissions for acute ambulatory care sensitive conditions (ACSCs), and admissions for chronic ACSCs. The all-condition readmission measure, as specified by CMS, is risk-adjusted for age and a

number of clinical comorbidities. The ACSC measures are adjusted only for age and gender, although for chronic ACSCs all eligible cases must have the chronic condition of interest. For all measures, performance was reported as a z-score, representing the number of standard deviations from the peer group mean. The peer group for a given quality measure was all US practices with at least 20 eligible cases for the measure.

In the first year of the VM Program, practices had to report on quality using one of three mechanisms, each with its own minimum reporting requirement: 1) the Group Practice Reporting Option web interface with 24 measures, 2) a qualified registry with at least three measures chosen from the more than 200 quality metrics offered, or 3) a standard claims-based panel with 14 measures. Additionally, for all practices, there were three mandatory, claims-based quality metrics: readmissions, admissions for acute ambulatory care sensitive conditions (ACSCs), and admissions for chronic ACSCs. Quality measures were categorized within one of six domains (clinical process/effectiveness, patient and family engagement, population/public health, patient safety, care coordination, and efficient use of health care resources). The mandatory quality measures were all part of the care coordination domain. Measure scores based on at least 20 cases were averaged to create domain scores. Thus, for a given domain, the measures included in that domain could vary among practices. Of the six quality domains, two (patient and family engagement, and efficient use of health care resources) applied to fewer than 10 practices, and thus were not included in our performance analyses. Domain scores were equally weighted and averaged to create a quality composite for each practice; if a practice did not have any measures in a particular domain, that domain was not included in the composite.

**eTable 1. VM Measures and Domains**

| <b>Measures</b>                                                                                          | <b>Domain</b>                  |
|----------------------------------------------------------------------------------------------------------|--------------------------------|
| <b>Calculated by CMS for all practices:</b>                                                              |                                |
| ACSC Acute Conditions Composite                                                                          | Care Coordination              |
| PQI-11 Bacterial Pneumonia**                                                                             | Care Coordination              |
| PQI-12 Urinary Tract Infection**                                                                         | Care Coordination              |
| PQI-10 Dehydration**                                                                                     | Care Coordination              |
| ACSC Chronic Conditions Composite                                                                        | Care Coordination              |
| Diabetes (composite of 4 indicators)**                                                                   | Care Coordination              |
| PQI-5 Chronic Obstructive Pulmonary Disease (COPD) or Asthma**                                           | Care Coordination              |
| PQI-8 Heart Failure**                                                                                    | Care Coordination              |
| All-Cause Hospital Readmissions                                                                          | Care Coordination              |
| <b>Administrative Claims-Based Quality Measures (elected by some practices)</b>                          |                                |
| Osteoporosis Management in Women $\geq 67$ Who Had a Fracture                                            | Clinical Process/Effectiveness |
| Use of Spirometry Testing to Diagnose Chronic Obstructive Pulmonary Disease (COPD)                       | Clinical Process/Effectiveness |
| Dilated Eye Exam for Beneficiaries $\leq 75$ with Diabetes                                               | Clinical Process/Effectiveness |
| HbA1c Testing for Beneficiaries $\leq 75$ with Diabetes                                                  | Clinical Process/Effectiveness |
| Nephropathy Screening Test or Evidence of Existing Nephropathy for Beneficiaries $\leq 75$ with Diabetes | Clinical Process/Effectiveness |
| Lipid Profile for Beneficiaries $\leq 75$ with Diabetes                                                  | Clinical Process/Effectiveness |
| Lipid Profile for Beneficiaries with Ischemic Vascular Disease (IVD)                                     | Clinical Process/Effectiveness |
| Adherence to Statin Therapy for Beneficiaries with Coronary Artery Disease (CAD)                         | Clinical Process/Effectiveness |
| Antidepressant Treatment for Depression:                                                                 | Clinical Process/Effectiveness |
| Acute Phase Treatment (at least 12 weeks)                                                                | Clinical Process/Effectiveness |
| 1. Continuation Phase Treatment (at least 6 months)                                                      | Clinical Process/Effectiveness |
| 2. Lipid Profile for Beneficiaries Who Started Lipid-Lowering Medications                                | Clinical Process/Effectiveness |
| Breast Cancer Screening for Women Ages 50–74                                                             | Clinical Process/Effectiveness |
| Use of High Risk Medications in the Elderly                                                              | Patient Safety                 |
| 1. Patients Who Receive At Least One Drug to Be Avoided**                                                | Patient Safety                 |
| 2. Patients Who Receive At Least Two Different Drugs to Be Avoided**                                     | Patient Safety                 |
| Lack of Monthly International Normalized Ratio (INR) Monitoring for Beneficiaries on Warfarin**          | Patient Safety                 |
| Follow-Up After Hospitalization for Mental Illness                                                       | Care Coordination              |
| 1. Percentage of Patients Receiving Follow-Up Within 30 Days                                             | Care Coordination              |
| 2. Percentage of Patients Receiving Follow-Up Within 7 Days                                              | Care Coordination              |

| <b>Measures</b>                                                                                                                                                                                  | <b>Domain</b>                  |
|--------------------------------------------------------------------------------------------------------------------------------------------------------------------------------------------------|--------------------------------|
| <b>GPRO Web Interface Quality Measures (elected by some practices)</b>                                                                                                                           |                                |
| Coronary Artery Disease (CAD): Composite (All or Nothing Scoring)                                                                                                                                | Clinical Process/Effectiveness |
| Coronary Artery Disease (CAD): Lipid Control                                                                                                                                                     | Clinical Process/Effectiveness |
| Coronary Artery Disease (CAD): Angiotensin-Converting Enzyme (ACE) Inhibitor or Angiotensin Receptor Blocker (ARB) Therapy—Diabetes or Left Ventricular Systolic Dysfunction (LVSD) (LVEF < 40%) | Clinical Process/Effectiveness |
| Diabetes Mellitus (DM): Hemoglobin A1c Poor Control                                                                                                                                              | Clinical Process/Effectiveness |
| Diabetes Mellitus (DM) Composite (All or Nothing Scoring)                                                                                                                                        | Clinical Process/Effectiveness |
| Diabetes Mellitus (DM): High Blood Pressure Control                                                                                                                                              | Clinical Process/Effectiveness |
| Diabetes Mellitus (DM): Low Density Lipoprotein (LDL-C) Control                                                                                                                                  | Clinical Process/Effectiveness |
| Diabetes Mellitus (DM): Hemoglobin A1c Control (< 8%)                                                                                                                                            | Clinical Process/Effectiveness |
| Diabetes Mellitus (DM): Daily Aspirin or Antiplatelet Medication Use for Patients with Diabetes and Ischemic Vascular Disease (IVD)                                                              | Clinical Process/Effectiveness |
| Diabetes Mellitus (DM): Tobacco Non-Use                                                                                                                                                          | Clinical Process/Effectiveness |
| Heart Failure (HF): Beta-Blocker Therapy for Left Ventricular Systolic Dysfunction (LVSD)                                                                                                        | Clinical Process/Effectiveness |
| Hypertension (HTN): Controlling High Blood Pressure                                                                                                                                              | Clinical Process/Effectiveness |
| Ischemic Vascular Disease (IVD): Complete Lipid Panel and Low Density Lipoprotein (LDL-C) Control                                                                                                | Clinical Process/Effectiveness |
| Ischemic Vascular Disease (IVD): Use of Aspirin or Another Antithrombotic                                                                                                                        | Clinical Process/Effectiveness |
| Preventive Care and Screening: Breast Cancer Screening for Women Aged 40-69                                                                                                                      | Clinical Process/Effectiveness |
| Preventive Care and Screening: Colorectal Cancer Screening                                                                                                                                       | Clinical Process/Effectiveness |
| Preventive Care and Screening: Pneumococcal Vaccination for Patients 65 Years and Older                                                                                                          | Clinical Process/Effectiveness |
| Preventive Care and Screening: Influenza Immunization                                                                                                                                            | Population/Public Health       |
| Preventive Care and Screening: Body Mass Index (BMI) Screening and Follow-Up                                                                                                                     | Population/Public Health       |
| Preventive Care and Screening: Tobacco Use: Screening and Cessation Intervention                                                                                                                 | Population/Public Health       |
| Preventive Care and Screening: Screening for High Blood Pressure and Follow-Up Documented                                                                                                        | Population/Public Health       |
| Preventive Care and Screening: Screening for Clinical Depression and Follow-Up Plan                                                                                                              | Population/Public Health       |
| Medication Reconciliation: Reconciliation After Discharge from an Inpatient Facility                                                                                                             | Patient Safety                 |
| Falls: Screening for Future Fall Risk                                                                                                                                                            | Patient Safety                 |

| <b>Measures</b>                                                                                                                                                  | <b>Domain</b>                  |
|------------------------------------------------------------------------------------------------------------------------------------------------------------------|--------------------------------|
| <b>GPRO Registry Quality Measures (elected by some practices)</b>                                                                                                |                                |
| Diabetes Mellitus (DM): Hemoglobin A1c Poor Control                                                                                                              | Clinical Process/Effectiveness |
| Diabetes Mellitus (DM): Low Density Lipoprotein (LDL-C) Control                                                                                                  | Clinical Process/Effectiveness |
| Diabetes Mellitus (DM): High Blood Pressure Control                                                                                                              | Clinical Process/Effectiveness |
| Heart Failure (HF): Angiotensin-Converting Enzyme (ACE) Inhibitor or Angiotensin Receptor Blocker (ARB) Therapy for Left Ventricular Systolic Dysfunction (LVSD) | Clinical Process/Effectiveness |
| Coronary Artery Disease (CAD): Antiplatelet Therapy                                                                                                              | Clinical Process/Effectiveness |
| Coronary Artery Disease (CAD): Beta-Blocker Therapy—Prior Myocardial Infarction (MI) or Left Ventricular Systolic Dysfunction (LVSD) (LVEF < 40%)                | Clinical Process/Effectiveness |
| Heart Failure (HF): Beta-Blocker Therapy for Left Ventricular Systolic Dysfunction (LVSD)                                                                        | Clinical Process/Effectiveness |
| Major Depressive Disorder (MDD): Antidepressant Medication During Acute Phase for Patients with MDD                                                              | Clinical Process/Effectiveness |
| Primary Open-Angle Glaucoma (POAG): Optic Nerve Evaluation                                                                                                       | Clinical Process/Effectiveness |
| Age-Related Macular Degeneration (AMD): Dilated Macular Examination                                                                                              | Clinical Process/Effectiveness |
| Diabetic Retinopathy: Documentation of Presence or Absence of Macular Edema and Level of Severity of Retinopathy                                                 | Clinical Process/Effectiveness |
| Diabetic Retinopathy: Communication with the Physician Managing Ongoing Diabetes Care                                                                            | Clinical Process/Effectiveness |
| Aspirin at Arrival for Acute Myocardial Infarction (AMI)                                                                                                         | Clinical Process/Effectiveness |
| Stroke and Stroke Rehabilitation: Deep Vein Thrombosis (DVT) Prophylaxis for Ischemic Stroke or Intracranial Hemorrhage                                          | Clinical Process/Effectiveness |
| Stroke and Stroke Rehabilitation: Discharged on Antithrombotic Therapy                                                                                           | Clinical Process/Effectiveness |
| Stroke and Stroke Rehabilitation: Anticoagulant Therapy Prescribed for Atrial Fibrillation (AF) at Discharge                                                     | Clinical Process/Effectiveness |
| Stroke and Stroke Rehabilitation: Screening for Dysphagia                                                                                                        | Clinical Process/Effectiveness |
| Stroke and Stroke Rehabilitation: Rehabilitation Services Ordered                                                                                                | Clinical Process/Effectiveness |
| Screening or Therapy for Osteoporosis for Women Aged 65 Years and Older                                                                                          | Clinical Process/Effectiveness |
| Osteoporosis: Management Following Fracture of Hip, Spine or Distal Radius for Men and Women Aged 50 Years and Older                                             | Clinical Process/Effectiveness |
| Osteoporosis: Pharmacologic Therapy for Men and Women Aged 50 Years and Older                                                                                    | Clinical Process/Effectiveness |
| Coronary Artery Bypass Graft (CABG): Use of Internal Mammary Artery (IMA) in Patients with Isolated CABG Surgery                                                 | Clinical Process/Effectiveness |
| Coronary Artery Bypass Graft (CABG): Preoperative Beta-Blocker in Patients with Isolated CABG Surgery                                                            | Clinical Process/Effectiveness |



| <b>Measures</b>                                                                                                          | <b>Domain</b>                  |
|--------------------------------------------------------------------------------------------------------------------------|--------------------------------|
| Urinary Incontinence: Assessment of Presence or Absence of Urinary Incontinence in Women Aged 65 Years and Older         | Clinical Process/Effectiveness |
| Urinary Incontinence: Characterization of Urinary Incontinence in Women Aged 65 Years and Older                          | Clinical Process/Effectiveness |
| Chronic Obstructive Pulmonary Disease (COPD): Spirometry Evaluation                                                      | Clinical Process/Effectiveness |
| Chronic Obstructive Pulmonary Disease (COPD): Bronchodilator Therapy                                                     | Clinical Process/Effectiveness |
| Asthma: Pharmacologic Therapy for Persistent Asthma—Ambulatory Care Setting                                              | Clinical Process/Effectiveness |
| Emergency Medicine: 12-Lead Electrocardiogram (ECG) Performed for Non-Traumatic Chest Pain                               | Clinical Process/Effectiveness |
| Emergency Medicine: 12-Lead Electrocardiogram (ECG) Performed for Syncope                                                | Clinical Process/Effectiveness |
| Emergency Medicine: Community-Acquired Pneumonia (CAP): Vital Signs                                                      | Clinical Process/Effectiveness |
| Emergency Medicine: Community-Acquired Pneumonia (CAP): Empiric Antibiotic                                               | Clinical Process/Effectiveness |
| Asthma: Assessment of Asthma Control—Ambulatory Care Setting                                                             | Clinical Process/Effectiveness |
| Hematology: Myelodysplastic Syndrome (MDS) and Acute Leukemias: Baseline Cytogenetic Testing Performed on Bone Marrow    | Clinical Process/Effectiveness |
| Hematology: Myelodysplastic Syndrome (MDS): Documentation of Iron Stores in Patients Receiving Erythropoietin Therapy    | Clinical Process/Effectiveness |
| Hematology: Multiple Myeloma: Treatment with Bisphosphonates                                                             | Clinical Process/Effectiveness |
| Hematology: Chronic Lymphocytic Leukemia (CLL): Baseline Flow Cytometry                                                  | Clinical Process/Effectiveness |
| Breast Cancer: Hormonal Therapy for Stage IC—IIIC Estrogen Receptor/Progesterone Receptor (ER/PR) Positive Breast Cancer | Clinical Process/Effectiveness |
| Colon Cancer: Chemotherapy for AJCC Stage III Colon Cancer Patients                                                      | Clinical Process/Effectiveness |
| Hepatitis C: Testing for Chronic Hepatitis C—Confirmation of Hepatitis C Viremia                                         | Clinical Process/Effectiveness |
| Hepatitis C: Ribonucleic Acid (RNA) Testing Before Initiating Treatment                                                  | Clinical Process/Effectiveness |
| Hepatitis C: Hepatitis C Virus (HCV) Genotype Testing Prior to Treatment                                                 | Clinical Process/Effectiveness |
| Hepatitis C: Antiviral Treatment Prescribed                                                                              | Clinical Process/Effectiveness |
| Hepatitis C: Hepatitis C Virus (HCV) Ribonucleic Acid (RNA) Testing at Week 12 of Treatment                              | Clinical Process/Effectiveness |

| <b>Measures</b>                                                                                                                                                                                  | <b>Domain</b>                  |
|--------------------------------------------------------------------------------------------------------------------------------------------------------------------------------------------------|--------------------------------|
| Hepatitis C: Counseling Regarding Risk of Alcohol Consumption                                                                                                                                    | Clinical Process/Effectiveness |
| Hepatitis C: Counseling Regarding Use of Contraception Prior to Antiviral Therapy                                                                                                                | Clinical Process/Effectiveness |
| Acute Otitis Externa (AOE): Topical Therapy                                                                                                                                                      | Clinical Process/Effectiveness |
| Breast Cancer Resection Pathology Reporting: pT Category (Primary Tumor) and pN Category (Regional Lymph Nodes) with Histologic Grade                                                            | Clinical Process/Effectiveness |
| Colorectal Cancer Resection Pathology Reporting: pT Category (Primary Tumor) and pN Category (Regional Lymph Nodes) with Histologic Grade                                                        | Clinical Process/Effectiveness |
| Prostate Cancer: Adjuvant Hormonal Therapy for High Risk Prostate Cancer Patients                                                                                                                | Clinical Process/Effectiveness |
| Adult Major Depressive Disorder (MDD): Comprehensive Depression Evaluation: Diagnosis and Severity                                                                                               | Clinical Process/Effectiveness |
| Adult Major Depressive Disorder (MDD): Suicide Risk Assessment                                                                                                                                   | Clinical Process/Effectiveness |
| Rheumatoid Arthritis (RA): Disease Modifying Anti-Rheumatic Drug (DMARD) Therapy                                                                                                                 | Clinical Process/Effectiveness |
| Preventive Care and Screening: Pneumococcal Vaccination for Patients 65 Years and Older                                                                                                          | Clinical Process/Effectiveness |
| Preventive Care and Screening: Breast Cancer Screening for Women Aged 40-69                                                                                                                      | Clinical Process/Effectiveness |
| Preventive Care and Screening: Colorectal Cancer Screening                                                                                                                                       | Clinical Process/Effectiveness |
| Diabetes Mellitus (DM): Dilated Eye Exam                                                                                                                                                         | Clinical Process/Effectiveness |
| Coronary Artery Disease (CAD): Angiotensin-Converting Enzyme (ACE) Inhibitor or Angiotensin Receptor Blocker (ARB) Therapy—Diabetes or Left Ventricular Systolic Dysfunction (LVSD) (LVEF < 40%) | Clinical Process/Effectiveness |
| Diabetes Mellitus (DM): Medical Attention for Nephropathy                                                                                                                                        | Clinical Process/Effectiveness |
| Adult Kidney Disease: Laboratory Testing (Lipid Profile)                                                                                                                                         | Clinical Process/Effectiveness |
| Adult Kidney Disease: Blood Pressure Management                                                                                                                                                  | Clinical Process/Effectiveness |
| Adult Kidney Disease: Patients On Erythropoiesis-Stimulating Agent (ESA)—Hemoglobin Level > 12.0 g/dL                                                                                            | Clinical Process/Effectiveness |
| Diabetes Mellitus (DM): Diabetic Foot and Ankle Care, Peripheral Neuropathy—Neurological Evaluation                                                                                              | Clinical Process/Effectiveness |
| Diabetes Mellitus (DM): Diabetic Foot and Ankle Care, Ulcer Prevention—Evaluation of Footwear                                                                                                    | Clinical Process/Effectiveness |
| Melanoma: Continuity of Care—Recall System                                                                                                                                                       | Clinical Process/Effectiveness |
| Age-Related Macular Degeneration (AMD): Counseling on Antioxidant Supplement                                                                                                                     | Clinical Process/Effectiveness |

| <b>Measures</b>                                                                                                          | <b>Domain</b>                  |
|--------------------------------------------------------------------------------------------------------------------------|--------------------------------|
| Osteoarthritis (OA): Assessment for Use of Anti-Inflammatory or Analgesic Over-the-Counter (OTC) Medications             | Clinical Process/Effectiveness |
| HIV/AIDS: CD4+ Cell Count or CD4+ Percentage                                                                             | Clinical Process/Effectiveness |
| HIV/AIDS: Pneumocystis Jiroveci Pneumonia (PCP) Prophylaxis                                                              | Clinical Process/Effectiveness |
| HIV/AIDS: Adolescent and Adult Patients with HIV/AIDS Who Are Prescribed Potent Antiretroviral Therapy                   | Clinical Process/Effectiveness |
| HIV/AIDS: HIV RNA Control After Six Months of Potent Antiretroviral Therapy                                              | Clinical Process/Effectiveness |
| Diabetes Mellitus (DM): Foot Exam                                                                                        | Clinical Process/Effectiveness |
| Coronary Artery Bypass Graft (CABG): Prolonged Intubation                                                                | Clinical Process/Effectiveness |
| Coronary Artery Bypass Graft (CABG): Deep Sternal Wound Infection Rate                                                   | Clinical Process/Effectiveness |
| Coronary Artery Bypass Graft (CABG): Stroke                                                                              | Clinical Process/Effectiveness |
| Coronary Artery Bypass Graft (CABG): Postoperative Renal Failure                                                         | Clinical Process/Effectiveness |
| Coronary Artery Bypass Graft (CABG): Surgical Re-Exploration                                                             | Clinical Process/Effectiveness |
| Coronary Artery Bypass Graft (CABG): Antiplatelet Medications at Discharge                                               | Clinical Process/Effectiveness |
| Coronary Artery Bypass Graft (CABG): Beta-Blockers Administered at Discharge                                             | Clinical Process/Effectiveness |
| Coronary Artery Bypass Graft (CABG): Anti-Lipid Treatment at Discharge                                                   | Clinical Process/Effectiveness |
| Hemodialysis Vascular Access Decision-Making by Surgeon to Maximize Placement of Autogenous Arterial Venous (AV) Fistula | Clinical Process/Effectiveness |
| Rheumatoid Arthritis (RA): Tuberculosis Screening                                                                        | Clinical Process/Effectiveness |
| Rheumatoid Arthritis (RA): Periodic Assessment of Disease Activity                                                       | Clinical Process/Effectiveness |
| Rheumatoid Arthritis (RA): Functional Status Assessment                                                                  | Clinical Process/Effectiveness |
| Rheumatoid Arthritis (RA): Assessment and Classification of Disease Prognosis                                            | Clinical Process/Effectiveness |
| Stroke and Stroke Rehabilitation: Thrombolytic Therapy                                                                   | Clinical Process/Effectiveness |
| Cataracts: 20/40 or Better Visual Acuity within 90 Days Following Cataract Surgery                                       | Clinical Process/Effectiveness |
| Oncology: Cancer Stage Documented                                                                                        | Clinical Process/Effectiveness |
| Radiology: Stenosis Measurement in Carotid Imaging Reports                                                               | Clinical Process/Effectiveness |
| Coronary Artery Disease (CAD): Lipid Control                                                                             | Clinical Process/Effectiveness |
| Heart Failure (HF): Left Ventricular Ejection Fraction (LVEF) Assessment                                                 | Clinical Process/Effectiveness |
| Ischemic Vascular Disease (IVD): Blood Pressure Management                                                               | Clinical Process/Effectiveness |
| Ischemic Vascular Disease (IVD): Use of Aspirin or Another Antithrombotic                                                | Clinical Process/Effectiveness |

| <b>Measures</b>                                                                                                                             | <b>Domain</b>                  |
|---------------------------------------------------------------------------------------------------------------------------------------------|--------------------------------|
| HIV/AIDS: Sexually Transmitted Disease Screening for Chlamydia and Gonorrhea                                                                | Clinical Process/Effectiveness |
| HIV/AIDS: Sexually Transmitted Disease Screening for Syphilis                                                                               | Clinical Process/Effectiveness |
| Functional Communication Measure—Spoken Language Comprehension for Patients with Diagnosis of Late Effects of Cerebrovascular Disease (CVD) | Clinical Process/Effectiveness |
| Functional Communication Measure—Attention for Patients with Diagnosis of Late Effects of Cerebrovascular Disease (CVD)                     | Clinical Process/Effectiveness |
| Functional Communication Measure—Memory for Patients with Diagnosis of Late Effects of Cerebrovascular Disease (CVD)                        | Clinical Process/Effectiveness |
| Functional Communication Measure—Motor Speech for Patients with Diagnosis of Late Effects of Cerebrovascular Disease (CVD)                  | Clinical Process/Effectiveness |
| Functional Communication Measure—Reading for Patients with Diagnosis of Late Effects of Cerebrovascular Disease (CVD)                       | Clinical Process/Effectiveness |
| Functional Communication Measure—Spoken Language Expression for Patients with Diagnosis of Late Effects of Cerebrovascular Disease (CVD)    | Clinical Process/Effectiveness |
| Functional Communication Measure—Writing for Patients with Diagnosis of Late Effects of Cerebrovascular Disease (CVD)                       | Clinical Process/Effectiveness |
| Functional Communication Measure—Swallowing for Patients with Diagnosis of Late Effects of Cerebrovascular Disease (CVD)                    | Clinical Process/Effectiveness |
| Heart Failure (HF): Left Ventricular Function (LVF) Testing                                                                                 | Clinical Process/Effectiveness |
| Asthma: Tobacco Use: Screening—Ambulatory Care Setting                                                                                      | Clinical Process/Effectiveness |
| Asthma: Tobacco Use: Intervention—Ambulatory Care Setting                                                                                   | Clinical Process/Effectiveness |
| Thoracic Surgery: Recording of Performance Status Prior to Lung or Esophageal Cancer Resection                                              | Clinical Process/Effectiveness |
| Hypertension (HTN): Controlling High Blood Pressure                                                                                         | Clinical Process/Effectiveness |
| Ischemic Vascular Disease (IVD): Complete Lipid Panel and Low Density Lipoprotein (LDL-C) Control                                           | Clinical Process/Effectiveness |
| Coronary Artery Disease (CAD): Symptom Management                                                                                           | Clinical Process/Effectiveness |
| Cardiac Rehabilitation Patient Referral from an Outpatient Setting                                                                          | Clinical Process/Effectiveness |
| Hypertension (HTN): Blood Pressure Management                                                                                               | Clinical Process/Effectiveness |
| Chronic Wound Care: Use of Wound Surface Culture Technique in Patients with Chronic Skin Ulcers (Overuse Measure)                           | Clinical Process/Effectiveness |
| Chronic Wound Care: Use of Wet to Dry Dressings in Patients with Chronic Skin Ulcers (Overuse Measure)                                      | Clinical Process/Effectiveness |
| Substance Use Disorders: Counseling Regarding Psychosocial and Pharmacologic Treatment Options for Alcohol Dependence                       | Clinical Process/Effectiveness |
| Substance Use Disorders: Screening for Depression Among Patients with Substance Abuse or Dependence                                         | Clinical Process/Effectiveness |
| Barrett’s Esophagus                                                                                                                         | Clinical Process/Effectiveness |

| <b>Measures</b>                                                                                                            | <b>Domain</b>                  |
|----------------------------------------------------------------------------------------------------------------------------|--------------------------------|
| Radical Prostatectomy Pathology Reporting                                                                                  | Clinical Process/Effectiveness |
| Immunohistochemical (IHC) Evaluation of Human Epidermal Growth Factor Receptor 2 Testing (HER2) for Breast Cancer Patients | Clinical Process/Effectiveness |
| Anticoagulation for Acute Pulmonary Embolus Patients                                                                       | Clinical Process/Effectiveness |
| Ultrasound Determination of Pregnancy Location for Pregnant Patients with Abdominal Pain                                   | Clinical Process/Effectiveness |
| Rh Immunoglobulin (Rhogam) for Rh-Negative Pregnant Women at Risk of Fetal Blood Exposure                                  | Clinical Process/Effectiveness |
| Statin Therapy at Discharge after Lower Extremity Bypass (LEB)                                                             | Clinical Process/Effectiveness |
| Preoperative Diagnosis of Breast Cancer                                                                                    | Clinical Process/Effectiveness |
| Sentinel Lymph Node Biopsy for Invasive Breast Cancer                                                                      | Clinical Process/Effectiveness |
| Epilepsy: Seizure Type(s) and Current Seizure Frequency(ies)                                                               | Clinical Process/Effectiveness |
| Epilepsy: Documentation of Etiology of Epilepsy or Epilepsy Syndrome                                                       | Clinical Process/Effectiveness |
| Epilepsy: Counseling for Women of Childbearing Potential with Epilepsy                                                     | Clinical Process/Effectiveness |
| Cataracts: Improvement in Patient's Visual Function within 90 Days Following Cataract Surgery                              | Clinical Process/Effectiveness |
| Adult Major Depressive Disorder (MDD): Coordination of Care of Patients with Specific Comorbid Conditions                  | Clinical Process/Effectiveness |
| Pediatric Kidney Disease: Adequacy of Volume Management                                                                    | Clinical Process/Effectiveness |
| Pediatric Kidney Disease: End Stage Renal Disease (ESRD) Patients Receiving Dialysis: Hemoglobin Level                     | Clinical Process/Effectiveness |
| < 10 g/dL                                                                                                                  |                                |
| Urinary Incontinence: Plan of Care for Urinary Incontinence in Women Aged 65 Years and Older                               | Patient and Family Engagement  |
| Osteoarthritis (OA): Function and Pain Assessment                                                                          | Patient and Family Engagement  |
| Oncology: Medical and Radiation—Pain Intensity Quantified                                                                  | Patient and Family Engagement  |
| Oncology: Medical and Radiation—Plan of Care for Pain                                                                      | Patient and Family Engagement  |
| Cataracts: Patient Satisfaction within 90 Days Following Cataract Surgery                                                  | Patient and Family Engagement  |
| Preventive Care and Screening: Influenza Immunization                                                                      | Population/Public Health       |
| Preventive Care and Screening: Body Mass Index (BMI) Screening and Follow-Up                                               | Population/Public Health       |
| Preventive Care and Screening: Unhealthy Alcohol Use—Screening                                                             | Population/Public Health       |
| Hepatitis C: Hepatitis A Vaccination in Patients with Hepatitis C Virus (HCV)                                              | Population/Public Health       |
| Hepatitis C: Hepatitis B Vaccination in Patients with Hepatitis C Virus (HCV)                                              | Population/Public Health       |

| <b>Measures</b>                                                                                                                                             | <b>Domain</b>            |
|-------------------------------------------------------------------------------------------------------------------------------------------------------------|--------------------------|
| Preventive Care and Screening: Tobacco Use: Screening and Cessation Intervention                                                                            | Population/Public Health |
| Preventive Care and Screening: Screening for High Blood Pressure and Follow-Up Documented                                                                   | Population/Public Health |
| Perioperative Care: Timing of Prophylactic Parenteral Antibiotic—Ordering Physician                                                                         | Patient Safety           |
| Perioperative Care: Selection of Prophylactic Antibiotic—First OR Second Generation Cephalosporin                                                           | Patient Safety           |
| Perioperative Care: Discontinuation of Prophylactic Parenteral Antibiotics (Non-Cardiac Procedures)                                                         | Patient Safety           |
| Perioperative Care: Venous Thromboembolism (VTE) Prophylaxis (When Indicated in ALL Patients)                                                               | Patient Safety           |
| Perioperative Care: Timely Administration of Prophylactic Parenteral Antibiotics                                                                            | Patient Safety           |
| Discontinuation of Prophylactic Antibiotics (Cardiac Procedures)                                                                                            | Patient Safety           |
| Medication Reconciliation: Reconciliation After Discharge from an Inpatient Facility                                                                        | Patient Safety           |
| Prevention of Catheter-Related Bloodstream Infections (CRBSI): Central Venous Catheter (CVC) Insertion Protocol                                             | Patient Safety           |
| Documentation of Current Medications in the Medical Record                                                                                                  | Patient Safety           |
| Radiology: Exposure Time Reported for Procedures Using Fluoroscopy                                                                                          | Patient Safety           |
| Falls: Risk Assessment                                                                                                                                      | Patient Safety           |
| Oncology: Radiation Dose Limits to Normal Tissues                                                                                                           | Patient Safety           |
| Thoracic Surgery: Recording of Clinical Stage Prior to Lung Cancer or Esophageal Cancer Resection                                                           | Patient Safety           |
| Elder Maltreatment Screen and Follow-Up Plan                                                                                                                | Patient Safety           |
| Cataracts: Complications Within 30 Days Following Cataract Surgery Requiring Additional Surgical Procedures                                                 | Patient Safety           |
| Perioperative Temperature Management                                                                                                                        | Patient Safety           |
| Thoracic Surgery: Pulmonary Function Tests Before Major Anatomic Lung Resection (Pneumonectomy, Lobectomy or Formal Segmentectomy)                          | Patient Safety           |
| Image Confirmation of Successful Excision of Image-Localized Breast Lesion                                                                                  | Patient Safety           |
| Atrial Fibrillation and Atrial Flutter: Chronic Anticoagulation Therapy                                                                                     | Patient Safety           |
| Osteoporosis: Communication with the Physician Managing Ongoing Care Post-Fracture of Hip, Spine or Distal Radius for Men and Women Aged 50 Years and Older | Care Coordination        |
| Advance Care Plan                                                                                                                                           | Care Coordination        |

| <b>Measures</b>                                                                                                                                                             | <b>Domain</b>     |
|-----------------------------------------------------------------------------------------------------------------------------------------------------------------------------|-------------------|
| Adult Kidney Disease: Hemodialysis Adequacy: Solute                                                                                                                         | Care Coordination |
| Adult Kidney Disease: Peritoneal Dialysis Adequacy: Solute                                                                                                                  | Care Coordination |
| Acute Otitis Externa (AOE): Systemic Antimicrobial Therapy—<br>Avoidance of Inappropriate Use                                                                               | Care Coordination |
| Melanoma: Coordination of Care                                                                                                                                              | Care Coordination |
| Primary Open-Angle Glaucoma (POAG): Reduction of<br>Intraocular Pressure (IOP) by 15% OR Documentation of a Plan<br>of Care                                                 | Care Coordination |
| Nuclear Medicine: Correlation with Existing Imaging Studies<br>for All Patients Undergoing Bone Scintigraphy                                                                | Care Coordination |
| Falls: Plan of Care                                                                                                                                                         | Care Coordination |
| Rheumatoid Arthritis (RA): Glucocorticoid Management<br>Functional Outcome Assessment                                                                                       | Care Coordination |
| Endoscopy & Polyp Surveillance: Colonoscopy Interval for<br>Patients with a History of Adenomatous Polyps—Avoidance of<br>Inappropriate Use                                 | Care Coordination |
| Referral for Otologic Evaluation for Patients with Congenital or<br>Traumatic Deformity of the Ear                                                                          | Care Coordination |
| Functional Deficit: Change in Risk-Adjusted Functional Status<br>for Patients with Knee Impairments                                                                         | Care Coordination |
| Functional Deficit: Change in Risk-Adjusted Functional Status<br>for Patients with Hip Impairments                                                                          | Care Coordination |
| Functional Deficit: Change in Risk-Adjusted Functional Status<br>for Patients with Lower Leg, Foot or Ankle Impairments                                                     | Care Coordination |
| Functional Deficit: Change in Risk-Adjusted Functional Status<br>for Patients with Lumbar Spine Impairments                                                                 | Care Coordination |
| Functional Deficit: Change in Risk-Adjusted Functional Status<br>for Patients with Shoulder Impairments                                                                     | Care Coordination |
| Functional Deficit: Change in Risk-Adjusted Functional Status<br>for Patients with Elbow, Wrist or Hand Impairments                                                         | Care Coordination |
| Functional Deficit: Change in Risk-Adjusted Functional Status<br>for Patients with Neck, Cranium, Mandible, Thoracic Spine,<br>Ribs or Other General Orthopedic Impairments | Care Coordination |
| Radiology: Reminder System for Mammograms                                                                                                                                   | Care Coordination |
| Surveillance After Endovascular Abdominal Aortic Aneurysm<br>Repair Care Coordination (EVAR)                                                                                | Care Coordination |
| Rate of Open Repair of Small or Moderate Non-Ruptured<br>Abdominal Aortic Aneurysms (AAA) without Major<br>Complications (Discharged to Home by Post-Operative Day #7)      | Care Coordination |

| <b>Measures</b>                                                                                                                                                                          | <b>Domain</b>                          |
|------------------------------------------------------------------------------------------------------------------------------------------------------------------------------------------|----------------------------------------|
| Rate of Endovascular Aneurysm Repair (EVAR) of Small or Moderate Non-Ruptured Abdominal Aortic Aneurysms (AAA) without Major Complications (Discharged to Home by Post-Operative Day #2) | Care Coordination                      |
| Rate of Carotid Endarterectomy (CEA) for Asymptomatic Patients without Major Complications (Discharged to Home by Post-Operative Day #2)                                                 | Care Coordination                      |
| Referral to Otologic Evaluation for Patients with Acute or Chronic Dizziness                                                                                                             | Care Coordination                      |
| Biopsy Follow-Up                                                                                                                                                                         | Care Coordination                      |
| Endoscopy/Polyp Surveillance: Appropriate Follow-Up Interval for Normal Colonoscopy in Average Risk Patients                                                                             | Care Coordination                      |
| Participation by a Hospital, Physician or Other Clinician in a Systematic Clinical Database Registry that Includes Consensus Endorsed Quality                                            | Care Coordination                      |
| Appropriate Treatment for Children with Upper Respiratory Infection (URI)                                                                                                                | Efficient Use of Health Care Resources |
| Appropriate Testing for Children with Pharyngitis                                                                                                                                        | Efficient Use of Health Care Resources |
| Prostate Cancer: Avoidance of Overuse of Bone Scan for Staging Low Risk Prostate Cancer Patients                                                                                         | Efficient Use of Health Care Resources |
| Antibiotic Treatment for Adults with Acute Bronchitis: Avoidance of Inappropriate Use                                                                                                    | Efficient Use of Health Care Resources |
| Radiology: Inappropriate Use of ‘Probably Benign’ Assessment Category in Mammography Screening                                                                                           | Efficient Use of Health Care Resources |
| Melanoma: Overutilization of Imaging Studies in Melanoma                                                                                                                                 | Efficient Use of Health Care Resources |
| Cardiac Stress Imaging Not Meeting Appropriate Use Criteria: Preoperative Evaluation in Low Risk Surgery Patients                                                                        | Efficient Use of Health Care Resources |
| Cardiac Stress Imaging Not Meeting Appropriate Use Criteria: Routine Testing After Percutaneous Coronary Intervention (PCI)                                                              | Efficient Use of Health Care Resources |
| Cardiac Stress Imaging Not Meeting Appropriate Use Criteria: Testing in Asymptomatic, Low Risk Patients                                                                                  | Efficient Use of Health Care Resources |
| <b>Cost Measures (calculated for all practices)</b>                                                                                                                                      |                                        |
| All Beneficiaries                                                                                                                                                                        | Total per capita costs                 |
| Costs for Beneficiaries with Specific Conditions                                                                                                                                         |                                        |
| Diabetes                                                                                                                                                                                 | Condition-specific per capita costs    |
| COPD                                                                                                                                                                                     | Condition-specific per capita costs    |
| Coronary Artery Disease                                                                                                                                                                  | Condition-specific per capita costs    |
| Heart Failure                                                                                                                                                                            | Condition-specific per capita costs    |



**eTable 2. Value Modifier, 2015 Payment Year**

|                     | <b>Low Quality</b> | <b>Average Quality</b> | <b>High Quality</b> |
|---------------------|--------------------|------------------------|---------------------|
| <b>Low Cost</b>     | 0.0%               | +1.0x%                 | +2.0x%              |
| <b>Average Cost</b> | -0.5%              | 0.0%                   | +1.0x%              |
| <b>High Cost</b>    | -1.0%              | -0.5%                  | 0.0%                |

Note: “X” is an upward payment adjustment factor, to ensure budget neutrality. For example, in 2015, the adjustment factor was 4.89, resulting in a maximum bonus of  $2.0 \times 4.89$  or 9.78%. Red indicates penalty, and green indicates bonus.

**eTable 3. Performance Regressions, Unadjusted**

| Measures                       | Intercept |        |       | High social risk only |        |       | High medical risk only |       |        | Both high social risk and high medical risk |         |       |        |       |         |
|--------------------------------|-----------|--------|-------|-----------------------|--------|-------|------------------------|-------|--------|---------------------------------------------|---------|-------|--------|-------|---------|
|                                | Beta      | 95% CI |       | Beta                  | 95% CI |       | p-value                | Beta  | 95% CI |                                             | p-value | Beta  | 95% CI |       | p-value |
| Clinical Process Effectiveness | 0.19      | 0.10   | 0.28  | -0.92                 | -1.22  | -0.62 | 0.000                  | -0.44 | -0.66  | -0.21                                       | 0.000   | -0.44 | -0.70  | -0.19 | 0.001   |
| Population/Public Health       | 0.05      | -0.07  | 0.16  | -0.06                 | -0.53  | 0.40  | 0.786                  | -0.26 | -0.61  | 0.10                                        | 0.157   | 0.03  | -0.49  | 0.55  | 0.914   |
| Patient Safety                 | 0.42      | 0.34   | 0.50  | -0.32                 | -0.60  | -0.05 | 0.022                  | -0.19 | -0.38  | 0.00                                        | 0.052   | -0.34 | -0.57  | -0.12 | 0.003   |
| Care Coordination              | 0.38      | 0.32   | 0.44  | -0.33                 | -0.53  | -0.13 | 0.001                  | -0.57 | -0.72  | -0.42                                       | 0.000   | -0.91 | -1.09  | -0.74 | 0.000   |
| Total per capita costs         | -0.26     | -0.44  | -0.08 | -0.92                 | -1.38  | -0.46 | 0.000                  | 2.19  | 1.78   | 2.61                                        | 0.000   | 1.21  | 0.79   | 1.64  | 0.000   |
| Condition specific costs       | -0.26     | -0.38  | -0.14 | -0.46                 | -0.81  | -0.12 | 0.009                  | 1.76  | 1.47   | 2.05                                        | 0.000   | 1.08  | 0.77   | 1.38  | 0.000   |
| Quality composite              | 0.18      | 0.09   | 0.28  | -1.04                 | -1.37  | -0.71 | 0.000                  | -0.73 | -0.98  | -0.49                                       | 0.000   | -0.96 | -1.24  | -0.68 | 0.000   |
| Cost composite                 | -0.18     | -0.25  | -0.10 | -0.35                 | -0.55  | -0.14 | 0.001                  | 1.00  | 0.81   | 1.18                                        | 0.000   | 0.57  | 0.38   | 0.76  | 0.000   |

Note: ACSC=ambulatory care sensitive condition, HF=heart failure, DM=diabetes mellitus, COPD=chronic obstructive pulmonary disease, and CAD=coronary artery disease.

**eTable 4. Ordinary Least Squares Payment Regressions, Unadjusted**

**a. With interaction term**

| Outcomes |                             | Intercept |        |      | High medical risk |        |      |              | High social risk |        |       |              | Interaction |        |       |              |
|----------|-----------------------------|-----------|--------|------|-------------------|--------|------|--------------|------------------|--------|-------|--------------|-------------|--------|-------|--------------|
|          |                             | Beta      | 95% CI |      | Beta              | 95% CI |      | p-value      | Beta             | 95% CI |       | p-value      | Beta        | 95% CI |       | p-value      |
| VM       | Performance-based bonus     | 0.03      | 0.02   | 0.04 | -0.03             | -0.05  | 0.00 | 0.035        | -0.02            | -0.05  | 0.01  | <b>0.216</b> | 0.02        | -0.03  | 0.06  | <b>0.422</b> |
|          | Neutral                     | 0.76      | 0.72   | 0.80 | -0.08             | -0.17  | 0.00 | <b>0.063</b> | -0.32            | -0.42  | -0.23 | 0.000        | 0.15        | 0.00   | 0.30  | 0.047        |
|          | Participation-based penalty | 0.21      | 0.17   | 0.25 | 0.10              | 0.01   | 0.18 | 0.026        | 0.32             | 0.23   | 0.41  | 0.000        | -0.17       | -0.31  | -0.02 | 0.023        |
|          | Performance-based penalty   | 0.00      | -0.01  | 0.01 | 0.01              | -0.01  | 0.03 | <b>0.157</b> | 0.02             | 0.00   | 0.04  | <b>0.097</b> | 0.00        | -0.03  | 0.03  | <b>0.970</b> |

**b. With four groups**

| Outcomes |                             | Intercept (Low-risk) |        |      | High medical risk only |        |      |              | High social risk only |        |       |              | Both  |        |       |         |
|----------|-----------------------------|----------------------|--------|------|------------------------|--------|------|--------------|-----------------------|--------|-------|--------------|-------|--------|-------|---------|
|          |                             | n=547                |        |      | n=128                  |        |      |              | n=102                 |        |       |              | n=122 |        |       |         |
|          |                             | Beta                 | 95% CI |      | Beta                   | 95% CI |      | p-value      | Beta                  | 95% CI |       | p-value      | Beta  | 95% CI |       | p-value |
| VM       | Performance-based bonus     | 0.03                 | 0.02   | 0.04 | -0.03                  | -0.05  | 0.00 | 0.035        | -0.02                 | -0.05  | 0.01  | <b>0.216</b> | -0.03 | -0.05  | 0.00  | 0.038   |
|          | Neutral                     | 0.76                 | 0.72   | 0.80 | -0.08                  | -0.17  | 0.00 | <b>0.063</b> | -0.32                 | -0.42  | -0.23 | 0.000        | -0.25 | -0.34  | -0.17 | 0.000   |
|          | Participation-based penalty | 0.21                 | 0.17   | 0.25 | 0.10                   | 0.01   | 0.18 | 0.026        | 0.32                  | 0.23   | 0.41  | 0.000        | 0.25  | 0.16   | 0.34  | 0.000   |
|          | Performance-based penalty   | 0.00                 | -0.01  | 0.01 | 0.01                   | -0.01  | 0.03 | <b>0.157</b> | 0.02                  | 0.00   | 0.04  | <b>0.097</b> | 0.03  | 0.01   | 0.05  | 0.002   |

Note: In the first table, the regressors are high social risk, high medical risk, and an interaction term. In the second table, the regressor is a categorical variable with four values (high social risk only, high medical risk only, both high social and high medical risk, and low-risk, which is the reference group). For both tables, practice-level OLS regressions were run separately for each line.

**eTable 5. Ordered Logistic Payment Regression, Unadjusted**

**a. With interaction term**

| Outcomes |                  | Intercept  |        | High medical risk |           |         | High social risk |           |         | Interaction |           |         |
|----------|------------------|------------|--------|-------------------|-----------|---------|------------------|-----------|---------|-------------|-----------|---------|
|          |                  | Odds Ratio | 95% CI | Odds Ratio        | 95% CI    | p-value | Odds Ratio       | 95% CI    | p-value | Odds Ratio  | 95% CI    | p-value |
| VM       | 4 Ordered Levels |            |        | 0.53              | 0.35 0.80 | 0.002   | 0.22             | 0.14 0.34 | 0.000   | 2.26        | 1.16 4.39 | 0.016   |

**b. With four groups**

| Outcomes |                  | Intercept (Low-risk) |        | High medical risk |           |         | High social risk |           |         | Both       |           |         |
|----------|------------------|----------------------|--------|-------------------|-----------|---------|------------------|-----------|---------|------------|-----------|---------|
|          |                  | n=547                |        | n=128             |           |         | n=102            |           |         | n=122      |           |         |
|          |                  | Odds                 | 95% CI | Odds Ratio        | 95% CI    | p-value | Odds Ratio       | 95% CI    | p-value | Odds Ratio | 95% CI    | p-value |
| VM       | 4 Ordered Levels |                      |        | 0.53              | 0.35 0.80 | 0.002   | 0.22             | 0.14 0.34 | 0.000   | 0.26       | 0.17 0.39 | 0.000   |

Note: The four outcomes are coded as follows: 1=performance-based penalty, 2=penalty for non-participation, 3=neutral, and 4=performance-based bonus.

**eTable 6. Ordinary Least Squares Payment Regressions, Unadjusted, With Simulated Performance-Based Payments**

**a. With interaction term**

| Outcomes |                               | Intercept |        |      | High medical risk |        |       | High social risk |       |        | Interaction |              |       |        |       |              |
|----------|-------------------------------|-----------|--------|------|-------------------|--------|-------|------------------|-------|--------|-------------|--------------|-------|--------|-------|--------------|
|          |                               | Beta      | 95% CI |      | Beta              | 95% CI |       | p-value          | Beta  | 95% CI |             | p-value      | Beta  | 95% CI |       | p-value      |
| VM       | Performance-based bonus       | 0.07      | 0.05   | 0.09 | -0.07             | -0.11  | -0.03 | 0.002            | -0.01 | -0.05  | 0.04        | <b>0.706</b> | 0.03  | -0.05  | 0.10  | <b>0.485</b> |
|          | Neutral                       | 0.69      | 0.65   | 0.73 | -0.17             | -0.26  | -0.08 | 0.000            | -0.37 | -0.47  | -0.27       | 0.000        | 0.25  | 0.10   | 0.41  | 0.001        |
|          | Penalty for non-participation | 0.21      | 0.17   | 0.25 | 0.10              | 0.01   | 0.18  | 0.026            | 0.32  | 0.23   | 0.41        | 0.000        | -0.17 | -0.31  | -0.02 | 0.023        |
|          | Performance-based penalty     | 0.04      | 0.01   | 0.06 | 0.14              | 0.09   | 0.19  | 0.000            | 0.06  | 0.01   | 0.12        | 0.029        | -0.11 | -0.20  | -0.02 | 0.011        |

**b. With four groups**

| Outcomes |                               | Intercept (Low-risk) |        |      | High medical risk |        |       | High social risk |       |        | Both  |              |       |        |       |         |
|----------|-------------------------------|----------------------|--------|------|-------------------|--------|-------|------------------|-------|--------|-------|--------------|-------|--------|-------|---------|
|          |                               | n=547                |        |      | n=128             |        |       | n=102            |       |        | n=122 |              |       |        |       |         |
|          |                               | Beta                 | 95% CI |      | Beta              | 95% CI |       | p-value          | Beta  | 95% CI |       | p-value      | Beta  | 95% CI |       | p-value |
| VM       | Performance-based bonus       | 0.07                 | 0.05   | 0.09 | -0.07             | -0.11  | -0.03 | 0.002            | -0.01 | -0.05  | 0.04  | <b>0.706</b> | -0.05 | -0.09  | -0.01 | 0.019   |
|          | Neutral                       | 0.69                 | 0.65   | 0.73 | -0.17             | -0.26  | -0.08 | 0.000            | -0.37 | -0.47  | -0.27 | 0.000        | -0.29 | -0.39  | -0.20 | 0.000   |
|          | Penalty for non-participation | 0.21                 | 0.17   | 0.25 | 0.10              | 0.01   | 0.18  | 0.026            | 0.32  | 0.23   | 0.41  | 0.000        | 0.25  | 0.16   | 0.34  | 0.000   |
|          | Performance-based penalty     | 0.04                 | 0.01   | 0.06 | 0.14              | 0.09   | 0.19  | 0.000            | 0.06  | 0.01   | 0.12  | 0.029        | 0.09  | 0.04   | 0.15  | 0.000   |

Note: In the first table, the regressors are high social risk, high medical risk, and an interaction term. In the second table, the regressor is a categorical variable with four values (high social risk only, high medical risk only, both high social and high medical risk, and low-risk, which is the reference group). For both tables, practice-level OLS regressions were run separately for each line.

**eTable 7. Ordered Logistic Payment Regression, Unadjusted, With Simulated Performance-Based Payments**

**a. With interaction term**

| Outcomes |                  | Intercept  |        | High medical risk |           |         | High social risk |           |         | Interaction |           |         |
|----------|------------------|------------|--------|-------------------|-----------|---------|------------------|-----------|---------|-------------|-----------|---------|
|          |                  | Odds Ratio | 95% CI | Odds Ratio        | 95% CI    | p-value | Odds Ratio       | 95% CI    | p-value | Odds Ratio  | 95% CI    | p-value |
| VM       | 4 Ordered Levels |            |        | 0.29              | 0.20 0.42 | 0.000   | 0.24             | 0.16 0.36 | 0.000   | 3.40        | 1.83 6.35 | 0.000   |

**b. Without interaction term**

| Outcomes |                  | Intercept (Low-risk) |        | High medical risk |           |         | High social risk |           |         | Both  |           |         |
|----------|------------------|----------------------|--------|-------------------|-----------|---------|------------------|-----------|---------|-------|-----------|---------|
|          |                  | n=547                |        | n=128             |           |         | n=102            |           |         | n=122 |           |         |
|          |                  | Odds                 | 95% CI | Odds              | 95% CI    | p-value | Odds             | 95% CI    | p-value | Odds  | 95% CI    | p-value |
| VM       | 4 Ordered Levels |                      |        | 0.29              | 0.20 0.42 | 0.000   | 0.24             | 0.16 0.36 | 0.000   | 0.24  | 0.16 0.35 | 0.000   |

Note: The four outcomes are coded as follows: 1=performance-based penalty, 2=penalty for non-participation, 3=neutral, and 4=performance-based bonus.
